# Supplementary material for: Improved response inhibition induced by attentional capture is associated with physical activity
Source: PeerJ. 2022 Sep 26;10:e14083. doi: 10.7717/peerj.14083 (PMC9521346; doi:10.7717/peerj.14083)
Supplement: Supplemental Information 1 [file peerj-10-14083-s001.xlsx]

## Sheet: Sheet1
Serial number		Height		IPAQ_SF	Weight	Height squared	BMI	Educational years	Age		SST1	Go RT	Go Accuracy		Stop Accuracy	SSD	nt_Go RT	SSRT		SST2	Go RT	Go Accuracy		SST3	Go RT	Go RT early	Go RT mid	Go RT terminal		Go ac	Go Accuracy early	Go Accuracy mid	Go Accuracy terminal
HG-001		175	1.75	3213	73	3.06	23.86	19	26			623.13	0.99		0.55	394.93	608	309.57			702.33	1			744.15	732.5	756.33	742.33		0.87	0.8	0.9	0.9
HG-002		170	1.7	3831	65	2.89	22.4913	19	27			509.85	0.975		0.5167	281.6	474	175.57			607.22	0.9			727.179	716.667	696.8	771.444		0.933333	0.9	1	0.9
HG-003		179	1.79	5964	75	3.2041	23.4075	18	24			373.21	0.975		0.4833	128.6	363	64.57			690.41	0.95			792.367	748.2	812.6	816.3		1	1	1	1
HG-004		170	1.7	4533	53	2.89	18.3391	19	27			572.44	0.975		0.5667	355.27	539	240.57			702.02	0.9833			791.767	791.3	834.5	749.5		1	1	1	1
HG-005		170	1.7	7066.5	55	2.89	19.0311	19	26			406.77	1		0.5	228.33	373	74.57			586.88	0.9833			712.033	730.7	701.4	704		1	1	1	1
HG-006		180	1.8	4417.5	77	3.24	23.7654	19	25			518.01	0.975		0.5333	381.33	464	165.57			737.7	0.8833			737.621	705.4	751.778	757.1		0.966667	1	0.9	1
HG-007		163	1.63	3573	54	2.6569	20.3244	14	21			566.66	0.9917		0.4833	269.7	568	269.57			687.47	0.9333			763.172	815.9	759.8	708.333		0.966667	1	1	0.9
HG-008		160	1.6	5982	53	2.56	20.7031	14	21			409.48	1		0.5167	164.87	384	85.57			670.17	1			736.414	719.7	783.333	710.9		0.966667	1	0.9	1
HG-009		175	1.75	6213	72	3.0625	23.5102	15	21			485.78	0.9917		0.5167	248.73	432	133.57			686.95	0.9667			712.25	738.333	714.889	686.4		0.933333	0.9	0.9	1
HG-010		178	1.78	4293	62.5	3.1684	19.726	15	21			395.89	0.9833		0.5	254.4	373	74.57			683.917	1			744.655	722.8	813.556	782.778		0.933333	1	0.9	0.9
HG-011		172	1.72	3693	55	2.9584	18.5911	13	21			627.27	0.9583		0.5833	410.8	608	309.57			771.93	0.9333			837.296	871.778	817.429	822.4		0.9	0.9	0.8	1
HG-012		180	1.8	3591	73.5	3.24	22.6852	17	26			583.709	0.975		0.55	296.333	561	262.57			737.962	0.883333			820.962	812.222	827.3	823.143		0.866667	0.9	1	0.7
HG-013		172	1.72	4391	78	2.9584	26.3656	18	25			480.3	0.975		0.5333	323.53	433	134.57			659.12	0.9833			723.133	721.4	697.9	750.1		1	1	1	1
HG-014		163	1.63	3680	57	2.6569	21.4536	19	26			628	0.925		0.55	436.86	609	310.57			673.24	0.9833			772.038	845.625	731.333	747.333		0.866667	0.8	0.9	0.9
HG-015		158	1.58	5857.5	52	2.4964	20.83	17	26			453.37	1		0.53	313.3	408	109.57			648.6	0.9167			765.067	757.6	772.2	765.4		1	1	1	1
HG-016		178	1.78	4551	80	3.1684	25.2493	19	26			423.314	0.983333		0.5167	260.067	377	78.57			644.458	0.983333			729.467	726.2	745.2	717		1	1	1	1
HG-017		159	1.59	3591	49	2.5281	19.3821	18	25			563.34	0.975		0.4833	325.8	532	233.57			675.75	0.9833			768.9	767.4	740.3	799		1	1	1	1
HG-018		175	1.75	5017.5	75	3.0625	24.4898	16	24			543.07	0.9917		0.5333	283.87	542	243.57			729.73	0.9833			798.467	781.3	813.3	800.8		1	1	1	1
HG-019		177	1.77	3231	80	3.1329	25.5354	15	23			664.61	0.8833		0.55	443.67	654	355.57			729.81	0.8833			782.654	771.4	759.444	828.571		0.866667	1	0.9	0.7
HG-020		179	1.79	5013	79	3.2041	24.6559	17	24			408.85	0.9917		0.5167	212.47	365	66.57			663.97	0.9833			790.417	768	823.875	779.375		0.8	0.8	0.8	0.8
HG-021		160	1.6	4150.5	51	2.56	19.9219	17	24			442.916	0.9917		0.5167	308.8	397	98.57			688.237	0.9833			709.63	704.111	705.25	718.1		0.9	0.9	0.8	1
HG-022		176	1.76	3324	78	3.0976	25.1808	15	23			574.97	1		0.52	343.93	569	270.57			698.81	0.98			761.66	783.2	743.9	757.44		0.97	1	1	0.9
HG-023		174	1.74	3946.5	66	3.0276	21.7994	15	22			473.4	1		0.5333	279.33	444	145.57			639.53	1			721.88	722.33	735.89	705.63		0.87	0.9	0.9	0.8
HG-024		173	1.73	3724	70	2.9929	23.3887	18	25			477.51	0.99		0.5	261.2	450	151.57			654.62	1			726.5	735.6	715.7	728.2		1	1	1	1
HG-025		178	1.78	3439.5	71	3.1684	22.4088	15	22			490.3	1		0.53	364.33	446	147.57			608.32	0.98			730.18	698.33	748.22	742.6		0.93	0.9	0.9	1
HG-026		182	1.82	3186	79	3.3124	23.8498	17	23			527.1	1		0.55	283.87	498	199.57			688.58	1			738.93	753.8	734.1	728.9		1	1	1	1
HG-027		177	1.77	3093	79	3.1329	25.2163	18	24			530.9	0.98		0.52	252.13	514	215.57			623.93	0.95			775.14	743.67	783.4	795.2		0.97	0.9	1	1
HG-028		171	1.71	3573	65	2.9241	22.2291	15	21			498.19	1		0.52	245.33	505	206.57			604.92	0.98			729.07	713.2	746.6	727.4		1	1	1	1
LG-001		177	1.77	826.5	78	3.1329	24.8971	19	26			536.87	0.9917		0.5333	337.13	518	236.15			661.75	1			732.5	759.33	740.8	696.44		0.933	0.9	1	0.9
LG-002		168	1.68	231	51.5	2.8224	18.2469	17	24			606.48	0.9667		0.5333	377.93	587	305.15			635.64	0.9333			726.652	783.143	684.571	715.444		0.766667	0.7	0.7	0.9
LG-003		175	1.75	822	75	3.0625	24.4898	15	23			441.98	0.9667		0.5	162.6	418	136.15			638.62	0.9667			725.296	738.556	711.222	726.111		0.9	0.9	0.9	0.9
LG-004		176	1.76	706.5	58	3.0976	18.7242	17	23			599.24	0.95		0.4833	349.6	609	327.15			690.97	0.95			752.643	734.3	775	750.667		0.933333	1	0.9	0.9
LG-005		171	1.71	826.5	60	2.9241	20.5191	19	26			645.98	0.9		0.6	353	598	316.15			750	0.8667			806.423	833.5	771.667	812.429		0.866667	1	0.9	0.7
LG-006		163	1.63	817.5	75	2.6569	28.2284	14	21			514.23	1		0.5167	210.2	485	203.15			737.49	0.95			819.931	830	826.1	801.889		0.966667	1	1	0.9
LG-007		163	1.63	577.5	58	2.6569	21.83	19	25			426.49	0.9417		0.4667	111.03	408	126.15			635.43	0.9667			762.6	723.4	804.5	759.9		1	1	1	1
LG-008		153	1.53	711	48	2.3409	20.5049	19	25			509.81	0.9833		0.55	253.27	483	201.15			674.98	1			749.917	703	739.375	807.375		0.8	0.8	0.8	0.8
LG-009		155	1.55	462	53	2.4025	22.0604	20	27			554.36	0.9833		0.5333	292.93	532	250.15			715.46	0.95			774.038	734.375	808.7	770.375		0.866667	0.8	1	0.8
LG-010		172	1.72	1191	55	2.9584	18.5911	16	24			540.45	0.9917		0.55	278.2	502	220.15			699.27	0.9833			774.655	744.6	782.8	799		0.966667	1	1	0.9
LG-011		165	1.65	346.5	75	2.7225	27.5482	17	26			690.71	0.9417		0.55	426.66	674	392.15			709.67	0.95			786.444	795	749.75	808.1		0.9	0.9	0.8	1
LG-012		173	1.73	577.5	83	2.9929	27.7323	18	24			564.02	0.975		0.5833	336	532	250.15			738.31	0.9667			809.276	781.7	769.444	872.7		0.966667	1	0.9	1
LG-013		160	1.6	462	51	2.56	19.9219	18	26			511.2	0.9917		0.5333	273.67	500	218.15			761.42	0.8833			807.44	849.333	785.778	781.429		0.833333	0.9	0.9	0.7
LG-014		170	1.7	346.5	57	2.89	19.7232	15	21			523.85	0.9667		0.5	239.67	505	223.15			686.79	0.8667			831.19	689	851.375	855.333		0.7	0.7	0.8	0.6
LG-015		181	1.81	2746.5	72	3.2761	21.9774	15	21			410.01	0.98		0.5	177.33	393	111.15			622.42	0.98			717.5	715.5	698.38	734.8		0.93	1	0.8	1
LG-016		167	1.67	462	50	2.7889	17.9282	17	24			618	0.975		0.5167	375.67	620	338.15			657.27	1			762.923	795.6	739.875	745.125		0.866667	1	0.8	0.8
LG-017		175	1.75	346.5	50	3.0625	16.3265	18	24			576.95	0.9833		0.5167	302.57	570	288.15			729.1	1			785.885	743.625	779.778	829.556		0.866667	0.8	0.9	0.9
LG-018		171	1.71	702	54	2.9241	18.4672	19	27			516.2	0.9917		0.5167	290.67	493	211.15			744.41	0.9			796.963	779	836.111	775.375		0.9	1	0.9	0.8
LG-019		156	1.56	462	50	2.4336	20.5457	18	25			455.92	0.9833		0.45	155.23	455	173.15			776.57	0.7			800.714	777.6	792.8	839.5		0.933333	1	1	0.8
LG-020		165	1.65	231	53	2.7225	19.4674	15	22			677.89	0.8833		0.5667	431.2	657	375.15			708.51	0.9833			795.519	786.667	738.333	861.556		0.9	0.9	0.9	0.9
LG-021		158	1.58	471	45	2.4964	18.026	19	26			450.1	0.9917		0.4833	161.47	417	135.15			827.61	0.9333			830.208	888.5	872.167	842.667		0.766667	0.8	0.6	0.9
LG-022		173	1.73	1182	63	2.9929	21.0498	17	24			412.748	0.9917		0.5	268	373	91.15			765.655	0.966667			755.519	739.8	779.7	743.429		0.9	1	1	0.7
LG-023		166	1.66	346.5	51	2.7556	18.5078	13	20			682.24	0.9583		0.55	448.2	701	419.15			697.92	0.9833			757.885	746.25	760.6	766.125		0.866667	0.8	1	0.8
LG-024		172	1.72	2466	68	2.9584	22.9854	18	25			523.48	1		0.47	154.1	524	242.15			693.27	1			731.3	738.6	725.9	729.4		1	1	1	1
LG-025		175	1.75	1982	78	3.0625	25.4694	16	22			624.58	1		0.52	351.87	599	317.15			715.35	1			782.07	796.3	764.2	785.7		1	1	1	1
LG-026		179	1.79	2266.5	70	3.2041	21.847	16	23			563.33	1		0.52	325.8	561	279.15			702.35	1			758.34	725.67	776.3	769.8		0.97	0.9	1	1
LG-027		173	1.73	2862	68	2.9929	22.7204	17	24			411.59	1		0.52	238.53	380	98.15			679.32	0.98			777.34	772.4	776.33	783.2		0.97	1	0.9	1
LG-028		176	1.76	2799	67	3.0976	21.6296	15	22			494.14	0.98		0.55	347.33	464	182.15			602.37	0.98			783.17	765.8	784.5	799.2		1	1	1	1
LG-029		179	1.79	2364	72	3.2041	22.4712	14	23			520.23	1		0.52	159.77	493	211.15			658.43	0.97			794.28	773.6	795.78	813.6		0.97	1	0.9	1
LG-030		183	1.83	1751	87	3.3489	25.9787	19	26			546.84	1		0.52	265.73	535	253.15			699.32	1			784.63	783.2	803.2	767.5		1	1	1	1
